# Supplementary material
Source: MDPI journal article supplement (https://www.mdpi.com/2076-3417/11/21/10085)
Supplement: s1 [file s1]

# Nanodiamond—Carbon Black Hybrid Filler System for Demanding Applications of Natural Rubber—Butadiene Rubber Composite

Minna Poikelispää \*, Alexandra Shakun and Essi Sarlin

Faculty of Engineering and Natural Sciences, Tampere University, FI-33014 Tampere, Finland; alexandra.shakun@tuni.fi (A.S.); essi.sarlin@tuni.fi (E.S.)

\* Correspondence: minna.poikelispaa@tuni.fi

**Table S1.** The curing parameters of the compounds obtained from the rheometric curves.

|       | Scorch time *<br>(min) | Vulcanization time, $t'_{90}$<br>(min) | Minimum torque<br>(dNm) | Maximum torque<br>(dNm) |
|-------|------------------------|----------------------------------------|-------------------------|-------------------------|
| ND0   | 5.1                    | 7.2                                    | 0.42                    | 5.57                    |
| ND0.5 | 5.4                    | 7.6                                    | 0.41                    | 5.10                    |
| ND1   | 5.6                    | 7.6                                    | 0.39                    | 4.96                    |
| ND2.5 | 6.4                    | 8.2                                    | 0.44                    | 5.09                    |
| ND5   | 6.6                    | 8.7                                    | 0.47                    | 4.87                    |

\* Time when torque has increased 1 unit from the minimum value
